1 **Thermal regimes, but not mean temperatures, drive patterns of rapid**  
2 **climate adaptation at a continent-scale: evidence from the introduced**  
3 **European earwig across North America**

4 *Running title:* Climate adaptation in earwigs

5 Jean-Claude Tourneur<sup>1</sup>, Joël Meunier<sup>2\*</sup>

6 <sup>1</sup> Département des Sciences biologiques, Université du Québec à Montréal 141. Avenue du  
7 Président-Kennedy, Montréal, Québec, H2X 1Y4, Canada.

8 Email: [jc.tourneur@nb.sympatico.ca](mailto:jc.tourneur@nb.sympatico.ca)

9 <sup>2</sup> Institut de Recherche sur la Biologie de l’Insecte (IRBI), UMR 7261, CNRS, University of  
10 Tours, Tours, France.

11 Email: [joel.meunier@univ-tours.fr](mailto:joel.meunier@univ-tours.fr) | ORCID: 0000-0001-6893-2064

12 \*Corresponding author.

## ABSTRACT

13 The recent development of human societies has led to major, rapid and often inexorable  
14 changes in the environment of most animal species. Over the last decades, a growing number  
15 of studies formulated predictions on the modalities of animal adaptation to climate change,  
16 questioning how and at what speed animals should adapt to such changes, discussing the  
17 levels of risks imposed by changes in the mean and/or variance of temperatures on animal  
18 performance, and exploring the underlying roles of phenotypic plasticity and genetic  
19 inheritance. These fundamental predictions, however, remain poorly tested using field data.  
20 Here, we tested these predictions using a unique continental-scale data set in the European  
21 earwig *Forficula auricularia* L, a univoltine insect introduced in North America one century  
22 ago. We conducted a common garden experiment, in which we measured 13 life-history traits  
23 in 4158 field-sampled earwigs originating from 19 populations across North America. Our  
24 results first demonstrate that in less than 100 generations, this species modified 10 of the 13  
25 measured life-history traits in response to the encountered thermal regimes, defined as a  
26 variation of temperatures between seasons or months (here winter-summer and autumn-  
27 spring temperatures). We found, however, no response to the overall mean monthly  
28 temperatures of the invaded locations. Furthermore, our use of a common garden setup  
29 reveals that the observed changes in earwigs' life-history traits are not mere plastic responses  
30 to their current environment, but are either due to their genetic background and/or to the  
31 environmental conditions they experienced during early life development. Overall, these  
32 findings provide continent-scale support to the claims that adaptation to thermal changes  
33 occurs quickly, even in insects with long life cycles, and emphasize the importance of  
34 thermal regimes over mean population temperatures in climate adaptation.

35 **Keywords:** Temperature, Adaptation, Reproductive strategy, Climate change, Invasion,  
36 Dermaptera

## INTRODUCTION

37 The dramatic acceleration of climate change observed over the last decades challenges the  
38 ability of resident organisms to track these changes and adapt their life histories accordingly  
39 (Meehl and Tebaldi 2004, Parmesan 2006, Williams et al. 2007). Over the last decades,  
40 modelling and theoretical approaches have been developed to better understand the nature  
41 and extent of animals' response to such a climate change (Parmesan 2006). These studies  
42 formulated key predictions on how and at what speed animals should adapt to such changes,  
43 on the respective importance of an increase in the overall mean temperature and/or  
44 seasonality of a population on animal performance, as well as on the underlying roles of  
45 phenotypic plasticity and genetic inheritance in adaptation (Nylin and Gotthard 1998,  
46 Kingsolver et al. 2013, Paaijmans et al. 2013, Gilbert et al. 2014, Merilä and Hendry 2014,  
47 Levis and Pfennig 2016, Williams et al. 2017, Corl et al. 2018, Fox et al. 2019, Rohner et al.  
48 2019). For instance, these studies suggest that a rapid adaptation to climate change should be  
49 facilitated in organisms with fast development and short life-cycles, as found in many  
50 arthropods, whereas it should be more difficult in organisms exhibiting slow development  
51 and long life-cycle, as found in many vertebrates. Species should also be less sensitive to  
52 changes in seasonality compared to changes in overall mean temperatures when they are  
53 endotherms and/or when their entire life-cycle occur within a single season, whereas the  
54 opposite pattern is expected when they are ectotherms and/or have a life-cycle encompassing  
55 several seasons. Finally, phenotypic plasticity is often considered a keystone of rapid  
56 adaptation to environmental changes, whereas fixed and inherited patterns of adaptation are  
57 often thought to secondarily derive from the canalization of ancestral plastic variation  
58 (Chevin et al. 2010).

59 Although central in our current understanding of animal's responses to climate  
60 change, these fundamental predictions remain poorly tested in the field (Janion-Scheepers et

61 al. 2017, Blanckenhorn et al. 2018). This is probably because such field data are difficult to  
62 collect, as it typically requires measuring variation in life-history traits across multiple natural  
63 populations, over several years, and under different kind of climates. However, a powerful  
64 alternative consists in using field data of introduced species that quickly invaded large  
65 geographic areas exhibiting a broad diversity of thermal constraints (Huey et al. 2000,  
66 Bellard et al. 2016). In this study, we present and analyze such a unique field data set in one  
67 of these species, the European earwig *Forficula auricularia* Linnaeus (Dermaptera:  
68 Forficulidae), after its introduction in North America. This insect exhibits a broad native  
69 range extending across Europe, Asia and northern Africa (Lamb and Wellington 1975) from  
70 which it has been introduced to Australia, New Zealand, East Africa, East Indies, Tasmania  
71 and North America (Frank 1918, Guillet et al. 2000, Quarrell et al. 2018, Hill et al. 2019). Its  
72 presence in North America was first reported on the Pacific coast in Seattle (WA) in 1907  
73 (Fulton 1924), and then on the Atlantic coast in Newport (RI) in 1911 (Jones 1917) and in  
74 Vancouver (BC) in 1919 (Treherne 1923). From these introductory foci, *F. auricularia* first  
75 spread along the coasts to cover areas ranging from British Columbia to California and from  
76 Newfoundland to South Carolina, and then reached the interior of the continent in both  
77 United States of America (Crumb et al. 1941) and Canada (Wilson 1971, Cantrall 1972,  
78 Tourneur 2017). Given that this species produces only one generation per year (Tourneur and  
79 Gingras 1992, Meunier et al. 2012), these historical records reveal that its successful  
80 colonization of North America and thus its adaptation to a broad diversity of thermal  
81 environments occurred in less than 100 generations.

82         Because the univoltine life cycle of the European earwig lasts up to 2 years and  
83 encompasses all seasons and temperatures (Lamb 1976, Meunier et al. 2012), it has long been  
84 thought that annual mean temperatures and/or temperature seasonality could be major  
85 constraints in the success of *F. auricularia* invasions (Vancassel 1984, Hill et al. 2019).

86 However, it remains unclear whether this species can mitigate these thermal constraints, and  
87 whether it does so by adapting its life cycle and life-history traits (Ratz et al. 2016, Tourneur  
88 2018). The life cycle of the European earwig generally starts with the emergence of new  
89 adults in late spring to early July, with variation among populations. These adults form  
90 groups of up to several hundred individuals, in which both males and females typically mate  
91 with several partners (Weiß et al. 2014, Sandrin et al. 2015, Tourneur 2017). Females then  
92 burrow in the ground from mid fall to early winter and build a nest where they lay their first  
93 clutch of eggs. After egg laying, females stop their foraging activity and provide extensive  
94 forms of egg care until hatching (Gingras and Tourneur 2001, Boos et al. 2014, Koch and  
95 Meunier 2014, Thesing et al. 2015, Diehl and Meunier 2018, Körner et al. 2018). The eggs of  
96 this first clutch hatch in spring and mothers remain with their newly hatched larvae for  
97 several weeks, during which mothers provide larvae with multiple forms of care (Gingras and  
98 Tourneur 2001, Kölliker et al. 2015, Kramer et al. 2015) and larvae exhibit forms of sibling  
99 cooperation (Falk et al. 2014, Kramer et al. 2015, Kramer and Meunier 2016, Körner et al.  
100 2016). A few weeks later, the family unit is naturally disrupted. While larvae continue their  
101 development to adults in new social groups, some females produce a second clutch of eggs  
102 (i.e. iteroparous as compared to semelparous females), which will also receive pre- and post-  
103 hatching care and will hatch in late spring (Lamb and Wellington 1975, Meunier et al. 2012,  
104 Ratz et al. 2016). All females generally die during the following summer (Albouy and  
105 Caussanel 1990).

106 In this study, we used a common garden experiment to explore how *F. auricularia*  
107 responded to the different thermal environments encountered during their North American  
108 invasion over the last century, i.e. in less than 100 generations. In particular, we 1) tested  
109 whether and how individuals altered their life history traits in response to the thermal  
110 constraints of the invaded locations, 2) identified the thermal constraints to which they

111 adapted and 3) investigated the role of phenotypic plasticity in this adaptation. From 1988 to  
112 1995, we field-sampled individuals originating from 19 populations located from the East to  
113 the West coasts, maintained them under standard laboratory conditions and measured the  
114 properties of the 1<sup>st</sup> and 2<sup>nd</sup> clutches produced by each female in terms of egg laying date, egg  
115 number, egg development time and number of newly hatched larvae. We also recorded the  
116 reproductive strategy of the females (iteroparity versus semelparity), their reproductive  
117 outcome (total number of eggs and larvae produced over lifetime), as well as the  
118 experimental survival duration of the field-sampled males and females. To identify which  
119 thermal constraints the tested earwigs adapted to, we tested whether our measurements could  
120 be explained by the results of a principal component analyses (PCA) of the mean monthly  
121 temperatures of each population. This process characterizes patterns of variation among  
122 populations' temperatures without *a priori* definitions of their associations, i.e. without  
123 predetermining the focus on overall mean temperatures and/or specific thermal regimes  
124 (defined as variation of temperatures between seasons or months). If *F. auricularia*  
125 individuals adapted their life-cycle and life-history traits to the mean temperatures and/or  
126 thermal regimes of the population in which they have been sampled (and if this adaptation is  
127 determined by their genetic background and/or early life experience), we predict these traits  
128 to covary with the overall mean temperatures and/or variation in seasonal temperatures of  
129 their population (i.e. all sampled populations should show different performance in the  
130 common garden). Conversely, if earwig life-history traits are independent of the thermal  
131 environment of the population in which they have been sampled (i.e. no adaptation) and/or  
132 are plastic to their current thermal environment, we predict no apparent association between  
133 the traits measured in our field-sampled individuals and the thermal regimes of their  
134 populations (i.e. all sampled populations should show similar performance in the common  
135 garden).

## MATERIAL AND METHODS

### 136 **Earwig sampling and laboratory rearing**

137 All *F. auricularia* individuals were collected over 7 years among 19 natural populations  
138 located across North America (Figure 1, Table 1). These individuals were mostly collected as  
139 adults using wooden traps (Tourneur 2018) between July and August, and were immediately  
140 setup in glass containers (Mason Jars Company, Erie, Pennsylvania, United States of  
141 America) in groups of 20 to 30 individuals. These containers received two sheets of creased  
142 toilet paper as resting places for earwigs, and were then transported to the laboratory in  
143 Montreal, Canada. Upon their arrival, containers were deposited in a shelf covered by a  
144 shelter and maintained under the natural outdoor conditions of Montreal. During their  
145 transport and outdoor maintenance, containers received an *ad libitum* amount of carrots and  
146 pollen as a food source for earwigs, and were supplied with water by means of a cotton pad  
147 regularly soaked in water. This setup allowed earwigs to perform non-controlled mating and  
148 to live in groups – just like they do under natural conditions (Weiß et al. 2014, Sandrin et al.  
149 2015, Kohlmeier et al. 2016, Körner et al. 2018).

150 One to two months later (between the 7<sup>th</sup> and the 19<sup>th</sup> day of October of each year),  
151 we used 4158 of these field-sampled individuals to set up 2079 mating pairs (from 17 to 356  
152 pairs per population, see Table 1), in which we subsequently measured 13 life-history traits  
153 (see below). These pairs were set up in Petri dishes (diameter 10 cm) lined with a thin layer  
154 of moist sand, and in which food was changed and substrate humidified once a week. Each  
155 Petri dish was then transferred in a climate chamber and then maintained at  $10 \pm 1$  °C, a  
156 temperature close to the overall median temperature of the 19 sampled populations (i.e.  
157 9.5°C, see Table S1). Food was removed at egg laying to mimic the natural end of earwigs'

158 foraging activity (Kölliker 2007). At egg hatching, we discarded all newly emerged larvae  
159 from the experiments to trigger a novel ovarian cycle in the mothers and allow their  
160 production of a subsequent clutch (Vancassel and Foraste 1980, Meunier et al. 2012). We  
161 then maintained the pairs under the rearing conditions described above until our experiment  
162 ended, i.e. either one year after the beginning of our laboratory setup or at the death of the  
163 adult males and females. Overall, 3927 of the 4158 (94.4%) tested individuals died within the  
164 year following the beginning of our experiments, a value in line with previous data on *F.*  
165 *auricularia* lifespan (Albouy and Caussanel 1990). Note that recent studies revealed that  
166 North American *F. auricularia* encompasses two genetic subspecies with no apparent mixing  
167 of their populations (Wirth et al. 1998, Quarrell et al. 2018, Tourneur 2018). Although these  
168 subspecies were not considered in our analyses (our data were collected before the  
169 publication of these genetic analyses), the continuous distribution (unimodal data) of the life  
170 history traits measured across populations (Figures 2 to 4) suggests an absence of subspecies-  
171 specific values regarding these measurements. The potential co-occurrence of the two  
172 subspecies in our data set is thus unlikely to bias our study and its main conclusions.

### 173 **Measurements of the life-history traits**

174 For each mating pair, we measured 13 life-history traits encompassing the properties of the  
175 resulting 1<sup>st</sup> and 2<sup>nd</sup> clutches (when present), the reproductive strategy and reproductive  
176 outcomes of each female, as well as the experimental survival duration of both field-sampled  
177 males and females. These properties were obtained by recording the date of egg production,  
178 counting the number of eggs produced, calculating the duration of egg development until  
179 hatching (in days) and finally counting the number of larvae at egg hatching in both 1<sup>st</sup> and  
180 2<sup>nd</sup> clutches (when present). The reproductive strategies and reproductive outcomes of  
181 females were obtained by recording whether they were semelparous or iteroparous (i.e.  
182 produced one or two clutches in their lifetime, respectively), and by counting the total



183 number of eggs and larvae produced per female during their lifetime. Finally, we measured  
184 the experimental survival duration of adults by counting the number of days each male and  
185 female survived after October 1<sup>st</sup> of the year of field sampling. Although our measurement of  
186 survival duration does not necessarily reflect adults longevity, as individuals could have  
187 different ages at field sampling (see discussion), it nevertheless provides important insights  
188 into the period at which males and females of each population die during the year. Note that  
189 8.1% and 5.4% females from Santa Cruz and Asheville, respectively, produced a third clutch.  
190 This third clutch was not considered in the present study, as our experiment ended before  
191 their hatching.

## 192 **Extraction of mean temperatures and thermal regimes of each population**

193 We extracted the mean monthly temperature of the 19 studied populations using their GPS  
194 coordinates (Table 1) and the Worldclim database v2.0 (<http://www.worldclim.org/>) with a  
195 spatial resolution of 30 seconds. The mean temperatures provided by the Worldclim database  
196 are calculated over 30 years, from 1970 to 2000. To reduce dimensionality of co-varying  
197 temperatures in our data set while characterizing potential thermal regimes of each population  
198 without *a priori* definitions of their composition, we then conducted a Principal Component  
199 Analysis (PCA) on the set of 12 mean monthly temperatures per population (Table S1). This  
200 analysis provided us with 12 orthogonal principal components (PCs), out of which we  
201 retained the first three PCs (total variance explained = 98.6%, Table 2). The first component  
202 (PC1) was positively loaded by almost all monthly temperatures, therefore positively  
203 reflecting the overall mean temperature of a population. The second component (PC2)  
204 revealed variation in seasonality between February on one hand, and June, July, and August  
205 on the other hand. In particular, high values of PC2 reflected populations with cold February  
206 (winter) and warm summer, whereas small values of PC2 reflected populations with warm  
207 February (winter) and cold summer. Finally, the third component (PC3) captured variation in

208 seasonality between October and November on one hand, and April and May on the other  
209 hand. High values of PC3 therefore characterized populations with cold autumn and warm  
210 spring, whereas small values of PC3 characterized populations with warm autumn and cold  
211 spring.

## 212 **Statistical analyses**

213 To test whether *F. auricularia* adapt their life-cycle and life-history traits to North American  
214 temperatures, we conducted a series of 12 linear models (LM in R) and one generalized linear  
215 model (GLM in R) – see Table 3. In the 12 LMs, the three selected PCs and their interactions  
216 were entered as explanatory variables (PC1, PC2 and PC3), whereas the response variable  
217 was either egg laying date, egg number, egg development time and larvae number for the 1<sup>st</sup>  
218 or 2<sup>nd</sup> clutches (for a total of 8 LMs), the total number of eggs or larvae produced, or the  
219 survival duration of males or females. Note that both egg laying date and adult survival  
220 duration were calculated using October 1<sup>st</sup> as day 0. In the GLM, the response variable was  
221 the ratio of iteroparous females per population, which was entered using the command *cbind*  
222 in R (to weight each ratio by the sample size of its population) and fitted to a binomial error  
223 distribution corrected for overdispersion. In all our statistical models, the response variables  
224 were the mean values of each measured trait per population. They were also checked for  
225 homoscedasticity and normality of residuals, as well as simplified stepwise by removing all  
226 non-significant interaction terms (all  $P > 0.05$ ). To correct for inflated Type-I errors due to  
227 multiple testing (and provide an experiment-wide Type I error rate of 5%), all *P*-values were  
228 adjusted using False Discovery Rate (FDR) correction (Benjamini and Hochberg 1995). All  
229 analyses were conducted using the software R v3.5.1 loaded with the packages *raster*,  
230 *FactoMineR*, *rsq* and *rcompanion*.

## RESULTS

231 The 19 studied populations greatly varied in their mean temperatures and thermal regimes  
232 (Table S1), as well as in the mean values of the 13 traits measured in their sampled  
233 individuals (Figures 2 to 4; Tables S2 to S4). Mean monthly temperatures overall ranged  
234 from 22.9°C (July in Saluda) to -10.1°C (January in Montreal), while thermal amplitudes  
235 over a year ranged from 30.7°C (Montreal) to 7.9°C (Santa Cruz). For the traits measured in  
236 the 1<sup>st</sup> clutches, the mean dates of egg production ranged from 47.8 to 132.6 days after the 1<sup>st</sup>  
237 of October, the mean number of eggs per clutch from 23.2 to 66.0, the mean egg development  
238 time from 42.2 to 71.4 days and the mean number of larvae per clutch from 11.6 to 44.8. For  
239 the 2<sup>nd</sup> clutches, the mean dates of egg production ranged from 142.0 to 248.2 days after the  
240 1<sup>st</sup> of October, the mean number of eggs from 14.0 to 38.4, the mean egg development time  
241 from 10.0 to 63.7 days and the mean number of larvae from 0 to 17.7. Finally, the total  
242 number of eggs produced ranged from 28.1 to 83.4, the total number of larvae produced from  
243 13.0 to 46.3, the proportion of iteroparous females from 0 to 70.8%, and the survival duration  
244 of males and females from 82.0 to 299.8 days and from 146.0 to 322.5 days after the 1<sup>st</sup> of  
245 October, respectively.

246 Of the 13 measured traits, 10 varied together with the thermal regimes of the  
247 population of origin (Table 3). Five of these 10 traits were exclusively associated with PC2  
248 (February-summer temperatures), two traits were exclusively associated with PC3 (autumn-  
249 spring temperatures), and three traits were associated with both PC2 and PC3. By contrast, no  
250 traits were associated with PC1 (overall mean temperatures). The associations with PC2  
251 revealed that populations with cold February and warm summers (high PC2 values) had  
252 females that produced their 1<sup>st</sup> clutch of eggs earlier and these eggs had longer development  
253 time compared to populations exhibiting warm February and cold summers (low PC2 values,  
254 Figure 2). Similarly, females from the former populations were less likely to produce a

255 second clutch (i.e. to be iteroparous, Figure 3) and when they did so, their 2<sup>nd</sup> clutch eggs  
256 were less numerous (Figure 3) and showed longer development time (Figure 3). Moreover,  
257 females and males from populations with cold February and warm summers lived less long  
258 compared to adults from warm February and cold summers (Figure 4). On the other hand, the  
259 effects of PC3 reveal that populations exhibiting cold autumns and warm springs (high PC3  
260 values) had females that produced their 1<sup>st</sup> clutch of eggs later in the season and these eggs  
261 were less numerous compared to females from populations with warm autumns and cold  
262 springs (low PC3 values, Figure 2). Females from the former populations also had 2<sup>nd</sup> clutch  
263 eggs that exhibited a shorter developmental time (Figure 3), they produced an overall lower  
264 number of eggs (Figure 4) and had males with a longer survival duration (Figure 4). By  
265 contrast, PC1, PC2 and PC3 did not shape the number of 1<sup>st</sup> clutch larvae, as well as their  
266 total number and the dates of 2<sup>nd</sup> clutch egg laying (Figures 2, 3 and 4; Table 3).

## DISCUSSION

267 Shedding light on how species successfully adapt to a broad set of environmental constraints  
268 is of major importance to improve our general understanding of the mechanisms underlying  
269 animal adaptations to climate change. In this study, we demonstrate that the successful  
270 invasion of the European earwig across North America came with multiple changes in their  
271 life-history traits in response to the thermal regimes (sets of winter-summer and autumn-  
272 spring temperatures), but not to the overall mean temperature of the invaded areas. In  
273 particular, our data from 19 populations revealed that females changed their timing of first  
274 reproduction, their reproductive strategy and investment into egg production when facing  
275 different thermal regimes, while experimental survival duration of males and females varied  
276 accordingly. By contrast, we found no association between thermal regimes and both the  
277 timing of second reproduction and the total number of larvae produced per female.

278           We first showed that females produced their first clutch of eggs earlier when they  
279 came from populations facing warm summers and/or warm autumns (PC2 and PC3,  
280 respectively), and were less likely to produce a second clutch in populations with cold  
281 February. A plastic response to warm temperatures on egg laying date could be expected in  
282 nature: adult earwigs typically develop and mate during summer and autumn, so that warm  
283 temperatures during these seasons could accelerate their reproductive physiology (as shown  
284 in other insect species, Singh et al., 2018) and thus accelerate egg laying (Tourneur 2018).  
285 Similarly, cold Februaries might slow down the development of 1<sup>st</sup> clutch eggs and thus  
286 extend the corresponding period of egg care. This, in turn, might inhibit females'  
287 physiological transformation to produce a second clutch (Vancassel 1984, Gingras and  
288 Tourneur 2001, Tourneur 2018, Körner et al. 2018). However, our results were obtained  
289 under common garden conditions, which reveals that the observed effects of thermal regime  
290 on egg laying dates are not a plastic response to their current environment, but are either due  
291 to the environment experienced during their early life development (i.e. before field  
292 sampling), or due to an inherited basis that possibly emerged through canalization (Nylin and  
293 Gotthard 1998, Van Buskrik and Steiner 2009). It has been proposed that traits tightly linked  
294 to fitness are more strongly canalized due to past stabilizing selection (Falconer 1990). Our  
295 findings may therefore suggest that the observed changes in the timing of first reproduction  
296 and females' reproductive strategy may have first emerged as a plastic response to the  
297 thermal constraints of the different localities, then diverged between populations through  
298 canalization and ultimately become inherited traits – all this in a maximum of 100  
299 generations. Further experiments with naïve individuals remain, however, required to rule out  
300 an effect of early life experience.

301           Our data also reveal that thermal regimes are associated with lifetime egg production,  
302 but not with lifetime larvae production. In particular, the total number of eggs produced per

303 female decreased with decreasing autumn temperatures, whereas this association vanished  
304 with larvae number. This apparent discrepancy suggests that females from populations with  
305 the warmest autumns lost a larger number of eggs during egg development. A first  
306 explanation could be that these females produced eggs of lower quality and/or were less  
307 efficient in egg care, a process that is essential to ensure egg development until hatching in  
308 earwigs (Boos et al. 2014, Van Meyel et al. 2019). Whereas both effects should be tested in  
309 future studies, previous results may suggest that the second effect is unlikely, as maternal  
310 investment in post-hatching care is not population-specific, at least in Europe (Ratz et al.  
311 2016). Another explanation is that females consumed a larger part of their clutch in  
312 populations with the warmest compared to the coldest autumns. Filial egg consumption is a  
313 common phenomenon in insects (Elgar and Crespi 1992) and it has been recently reported in  
314 several Dermapteran species, such as the species studied here (Koch and Meunier 2014, Van  
315 Meyel et al. 2019) and the maritime earwig *Anisolabis maritima* Bonelli (Miller and Zink  
316 2012). In the European earwig, this phenomenon has been proposed to reflect an adaptive  
317 strategy to limit female weight loss during the period of egg care (i.e. when they stop all other  
318 foraging activities) and by doing so, to reallocate resources into post-hatching care and/or  
319 into a 2<sup>nd</sup> oogenesis cycle (Koch and Meunier 2014, Tourneur 2018). Given that females lay  
320 eggs earlier in populations with the warmest autumns, this increased egg consumption could  
321 be an adaptive strategy to limit the cost of tending newly hatched offspring earlier in the  
322 season (middle of winter) when food sources are scarce or absent. If this hypothesis holds  
323 true, it would suggest that filial egg cannibalism could be a strategy that *F. auricularia*  
324 females have evolved to better cope with warmer autumns.

325         In addition to the above findings, our results show that the survival duration of both  
326 males and females was associated with the thermal regime of the population of origin. In  
327 particular, females' and males' survival duration decreased together with warm summers (and

328 cold Februaries), while male's survival duration also decreased with warm autumns (and cold  
329 springs). The first results may be a by-product of the effect of temperature on their date of  
330 egg laying and/or egg hatching. In particular, we showed that females from populations  
331 facing warm summers are the first to lay their eggs. Individuals from these populations might  
332 thus have been the oldest at the date of our field sampling, therefore leading to the shortest  
333 survival duration in our subsequent experiment. Surprisingly, there was a sex-specific effect  
334 of spring (and autumn) temperatures on adult survival duration: males lived up to two times  
335 longer in populations with warm compared to cold springs (as well as cold compared to warm  
336 autumns), whereas this effect was absent in females. This finding may reflect sex-specific  
337 sensitivity to high temperatures in terms of, for instance, physiology or expression of costly  
338 behaviors. Whereas some physiological traits are known to be sex-specific in this species  
339 (Kohlmeier et al. 2016, Vogelweith et al. 2017), further studies should explore the effects of  
340 temperature on the observed differences. Notwithstanding its underlying mechanisms, the  
341 long survival duration of males in warm spring populations opens scope for these males to  
342 mate with females of the subsequent generation, as well as for a possible involvement of  
343 fathers into larva care – a phenomenon reported in other insect species (Smiseth 2014). These  
344 two processes remain unknown in the European earwig, but they could be of central  
345 importance in their successful adaptation to climate change.

346 All our results are based on a common garden experiment, a method that is often  
347 considered a powerful tool to disentangle the roles of phenotypic plasticity and genetic  
348 background on adaptation (Franks et al. 2014, Stoks et al. 2014, Blanckenhorn et al. 2018).  
349 Individuals reared under a common environment are typically expected to exhibit  
350 homogenized life-history traits if adaptation is the outcome of phenotypic plasticity, whereas  
351 they should exhibit population-specific traits otherwise. Our results are in line with the latter  
352 process for the great majority of the measured life-history traits (10 out of 13), therefore

353 suggesting that the observed associations between thermal regimes and life-history traits do  
354 not stem from a plastic response to their current environment. Nevertheless, common garden  
355 experiments often have some limits: they do not prevent maternal and grand maternal effects,  
356 they cannot preclude the possibility of genotype-by-environment interactions on the  
357 measured life-history traits, and they are poorly efficient at shedding light on the multiple  
358 facets of plasticity (e.g. some traits can be partially plastic, the plastic responses can vary in  
359 intensity and slope, and plasticity may become apparent only after certain thresholds) (Franks  
360 et al. 2014, Merilä and Hendry 2014, Stoks et al. 2014, Bodensteiner et al. 2019). These  
361 limits can be particularly important here, as maternal effects and harsh environments shape  
362 the nature and outcomes of several family interactions in earwigs (Meunier and Kölliker  
363 2012a, 2012b, Thesing et al. 2015, Raveh et al. 2016, Kramer et al. 2017). Concluding on the  
364 absence or limited role of plasticity in earwigs' adaptation to North American' thermal  
365 regimes would therefore need further empirical works exploring its multiple facets under  
366 several common garden conditions (Bodensteiner et al. 2019), and if present, demonstrating  
367 the adaptive value of this apparent plasticity.

368 To conclude, our results demonstrate that the spread of the European earwigs across  
369 North America came with important changes in their life-history traits and life cycle, and that  
370 these changes emerged in a maximum of 100 generations. Whereas we show that some of  
371 these changes are by-products of novel thermal constraints (timing of first reproduction and  
372 female iteroparity), we reveal that others are likely to reflect adaptive strategies to cope with  
373 different autumn temperatures (egg production and the possibility of egg cannibalism).  
374 Overall, these findings emphasize that adaptation of an insect with a relatively long life-cycle  
375 does not necessarily operate in response to the overall mean temperatures of the invaded  
376 environments, but to their thermal regimes – i.e. to seasonality and/or mean temperature at a  
377 specific time of their life-cycle. Whether the reported adaptations are the product of



378 population-differences in energetic/metabolic constraints experienced by adults during their  
379 early development (Wong and Kölliker 2014, English et al. 2016), and/or the product of an  
380 inherited genetic basis that varies with thermal regimes (Levis and Pfennig 2016; Corl et al.  
381 2018; Fox et al. 2019), as well as whether these adaptations are similar across its worldwide  
382 distribution (Frank 1918, Guillet et al. 2000, Huey et al. 2000, Quarrell et al. 2018, Hill et al.  
383 2019) will be investigated in future studies. On a more general level, our findings emphasize  
384 that studying invasive species can provide unique data sets to empirically and  
385 comprehensively test general predictions on animals' responses to climate change (Gilbert et  
386 al. 2014, Merilä and Hendry 2014, Levis and Pfennig 2016, Hulme 2017, Fox et al. 2019,  
387 Rohner et al. 2019), and therefore call for their open access to the entire research community  
388 - a timely task to which the present study contributes.

#### **AUTHOR CONTRIBUTION STATEMENT**

389 JCT designed the experiment, conducted field samplings, and run the experiments. JM  
390 analysed the data and wrote the first version of the manuscript. The final manuscript was  
391 commented and corrected by all authors.

#### **DATA AVAILABILITY**

392 The complete data set and R script are archived in the open data repository  
393 Zenodo (<https://doi.org/10.5281/zenodo.2652192>).

#### **ACKNOWLEDGMENTS**

394 This work is dedicated to the memory of Noelle Tourneur, for her constant support through  
395 JCT career. We thank Maximilian Körner, Franck Dedeine and Sylvain Pincebourde, as well

396 as Eric Gangloff, Ben Phillips and Fabien Aubret (PCI Evol Biol referees and recommenders,  
397 respectively) for their comments on a previous version of this manuscript. We also would like  
398 to thank Jean Gingras for his help during laboratory observations and samplings, as well as  
399 Michel Vancassel and Maryvonne Forasté for their help in the late 1980s.

#### **CONFLICT OF INTEREST**

400 The authors of this preprint declare that they have no financial conflict of interest with the  
401 content of this article. J Meunier is one of the PCI Evol Biol recommenders.

#### **REFERENCES**

402 **Table 1 – Details of the 19 sampled populations.** The table shows the name and location of  
 403 each population, their GPS coordinates (Latitude, Longitude), samplings years, total number  
 404 of mating pair setup across years (N. pairs), and thermal regimes (defined as PC1, PC2 and  
 405 PC3).

| Populations    | Country | State (USA)/Province (CDN) | Latitude | Longitude | Samplings    | N. pairs | PC1   | PC2   | PC3   |
|----------------|---------|----------------------------|----------|-----------|--------------|----------|-------|-------|-------|
| Asheville      | USA     | North Carolina             | 35.612   | -82.566   | 1994-95      | 80       | 4.60  | 0.73  | 0.74  |
| Charlestown    | USA     | Rhode Island               | 41.383   | -71.642   | 1990         | 42       | 1.37  | 0.73  | -0.84 |
| Deschutes      | USA     | Oregon                     | 44.157   | -121.256  | 1990         | 17       | -1.54 | -2.32 | -0.27 |
| Enderby        | CDN     | British Columbia           | 50.551   | -119.14   | 1989-90      | 121      | -1.68 | -0.02 | 1.14  |
| Ennis lake     | USA     | Montana                    | 45.447   | -111.695  | 1990         | 36       | -2.86 | -0.36 | 0.02  |
| Kimberley      | CDN     | British Columbia           | 49.635   | -115.998  | 1990         | 94       | -5.27 | -0.95 | 0.73  |
| Kingston       | USA     | Rhode Island               | 41.486   | -71.531   | 1991         | 137      | 1.00  | 0.76  | -0.75 |
| Montreal       | CDN     | Quebec                     | 45.542   | -73.893   | 1988,1990-95 | 356      | -2.78 | 2.32  | -0.07 |
| Pointe Pelée   | CDN     | Ontario                    | 41.963   | -82.518   | 1992         | 47       | 1.25  | 2.31  | -0.37 |
| Revelstoke     | CDN     | British Columbia           | 50.998   | -118.196  | 1989-90      | 100      | -2.69 | -0.11 | 0.95  |
| Rocky knob     | USA     | Virginia                   | 36.832   | -80.345   | 1993-94      | 304      | 1.44  | -0.07 | 0.48  |
| Saluda         | USA     | North Carolina             | 35.198   | -82.353   | 1993-95      | 117      | 5.03  | 0.69  | 0.77  |
| Santa Cruz*    | USA     | California                 | 36.926   | -121.845  | 1991         | 130      | 5.04  | -4.50 | -0.57 |
| Selkirk        | CDN     | Ontario                    | 42.834   | -79.932   | 1992-94      | 233      | -0.69 | 1.35  | -0.67 |
| Selinsgrove    | USA     | Pennsylvania               | 40.832   | -76.872   | 1993-94      | 134      | 1.76  | 1.83  | 0.27  |
| Truro          | CDN     | Nova Scotia                | 45.372   | -63.264   | 1988         | 39       | -3.46 | -0.13 | -1.42 |
| Vancouver      | CDN     | British Columbia           | 49.252   | -123.24   | 1989,1991    | 84       | 0.23  | -2.89 | -0.05 |
| Waterrock knob | USA     | North Carolina             | 35.464   | -83.138   | 1991-94      | 167      | -1.88 | -1.69 | 0.22  |
| Wheatley       | CDN     | Ontario                    | 42.094   | -82.445   | 1992         | 52       | 1.13  | 2.31  | -0.31 |

406 \* This population was called San Francisco in (Tourneur 2018).

407

408 **Table 2 – Loadings of the four first principal components (PCs) reflecting combinations of**  
 409 **the 12 mean monthly temperatures across populations. The traits having significant**  
 410 **loadings on each PC are in bold.**

|                                   | PC1          | PC2           | PC3           | PC4           |
|-----------------------------------|--------------|---------------|---------------|---------------|
| Jan                               | <b>0.800</b> | -0.589        | -0.066        | 0.083         |
| Feb                               | 0.716        | <b>-0.668</b> | 0.131         | 0.139         |
| Mar                               | <b>0.844</b> | -0.486        | 0.216         | 0.048         |
| Apr                               | <b>0.949</b> | -0.140        | <b>0.267</b>  | -0.082        |
| May                               | <b>0.890</b> | 0.321         | <b>0.286</b>  | <b>-0.145</b> |
| Jun                               | 0.731        | <b>0.665</b>  | 0.123         | -0.060        |
| Jul                               | 0.547        | <b>0.823</b>  | -0.006        | <b>0.143</b>  |
| Aug                               | 0.641        | <b>0.746</b>  | -0.013        | <b>0.175</b>  |
| Sep                               | <b>0.905</b> | 0.380         | -0.175        | -0.019        |
| Oct                               | <b>0.951</b> | 0.019         | <b>-0.292</b> | -0.064        |
| Nov                               | <b>0.931</b> | -0.174        | <b>-0.296</b> | -0.112        |
| Dec                               | <b>0.872</b> | -0.469        | -0.113        | 0.041         |
| Eigenvalues                       | 8.153        | 3.224         | 0.453         | 0.130         |
| Variance explained (%)            | <b>67.9</b>  | 26.9          | 3.8           | 1.1           |
| Cumulative variance explained (%) | 67.9         | 94.8          | 98.6          | 99.7          |

411

412 **Table 3 –Results of the statistical models on the 13 measured life-history traits.** *PC1 positively reflects the overall mean temperature of a*  
 413 *population. High values of PC2 reflect populations with cold February (winter) and warm summer, and vice-versa. High values of PC3 reflect*  
 414 *populations with warm spring and cold autumn, and vice-versa. P-values significant after FDR correction (adj-P) are in bold. Note that FDR*  
 415 *correction transforms each P-value in function of its rank of statistical significance in the data set, which can lead to similar corrected p-values.*  
 416 *Model estimates (estim).*

417

|                              | PC1    |      |       |       | PC2    |      |       |              | PC3    |       |       |              |
|------------------------------|--------|------|-------|-------|--------|------|-------|--------------|--------|-------|-------|--------------|
|                              | estim. | SE   | P     | adj-P | estim. | SE   | P     | adj-P        | estim. | SE    | P     | adj-P        |
| <b>First clutch</b>          |        |      |       |       |        |      |       |              |        |       |       |              |
| Egg laying date              | -1.55  | 1.47 | 0.307 | 0.665 | -8.92  | 2.34 | 0.002 | <b>0.011</b> | 20.37  | 6.23  | 0.005 | <b>0.014</b> |
| Egg number                   | -0.32  | 0.82 | 0.705 | 0.896 | 1.87   | 1.30 | 0.171 | 0.234        | -11.77 | 3.47  | 0.004 | <b>0.014</b> |
| Egg development time         | -0.31  | 0.53 | 0.575 | 0.896 | 2.16   | 0.85 | 0.022 | <b>0.041</b> | -4.57  | 2.26  | 0.061 | 0.132        |
| Larvae number                | -1.28  | 0.72 | 0.098 | 0.425 | 1.53   | 1.08 | 0.180 | 0.234        | -3.85  | 3.39  | 0.275 | 0.357        |
| <b>Second clutch</b>         |        |      |       |       |        |      |       |              |        |       |       |              |
| Egg laying date              | 0.79   | 2.01 | 0.700 | 0.896 | -3.28  | 3.26 | 0.331 | 0.391        | 13.13  | 8.46  | 0.143 | 0.233        |
| Egg number                   | 0.08   | 0.44 | 0.855 | 0.896 | -1.97  | 0.72 | 0.016 | <b>0.041</b> | 0.27   | 1.86  | 0.887 | 0.887        |
| Egg development time         | 1.92   | 0.92 | 0.059 | 0.381 | 3.93   | 1.48 | 0.021 | <b>0.041</b> | -19.02 | 4.04  | 0.001 | <b>0.005</b> |
| Larvae number                | -0.05  | 0.38 | 0.896 | 0.896 | -1.70  | 0.59 | 0.012 | <b>0.041</b> | 2.96   | 1.78  | 0.121 | 0.224        |
| <b>General</b>               |        |      |       |       |        |      |       |              |        |       |       |              |
| Total egg number             | 0.17   | 1.01 | 0.866 | 0.896 | -0.15  | 1.60 | 0.929 | 0.929        | -13.93 | 4.26  | 0.005 | <b>0.014</b> |
| Total larvae number          | -1.04  | 0.77 | 0.198 | 0.642 | 0.60   | 1.16 | 0.615 | 0.666        | -3.45  | 3.61  | 0.355 | 0.419        |
| Ratio of iteroparous females | 0.01   | 0.09 | 0.896 | 0.896 | -0.35  | 0.13 | 0.022 | <b>0.041</b> | -0.48  | 0.40  | 0.254 | 0.357        |
| Male longevity               | -10.26 | 3.63 | 0.013 | 0.165 | -23.93 | 5.77 | 0.001 | <b>0.011</b> | 65.49  | 15.39 | 0.001 | <b>0.005</b> |
| Female longevity             | -4.30  | 3.74 | 0.268 | 0.665 | -14.80 | 5.94 | 0.025 | <b>0.041</b> | 13.63  | 15.86 | 0.404 | 0.437        |

418 **Figure 1** – Map showing the 19 sampled populations across Canada (CND) and United

419 **States of America (USA)**. \* This population was called San Francisco in Tourneur (2018).

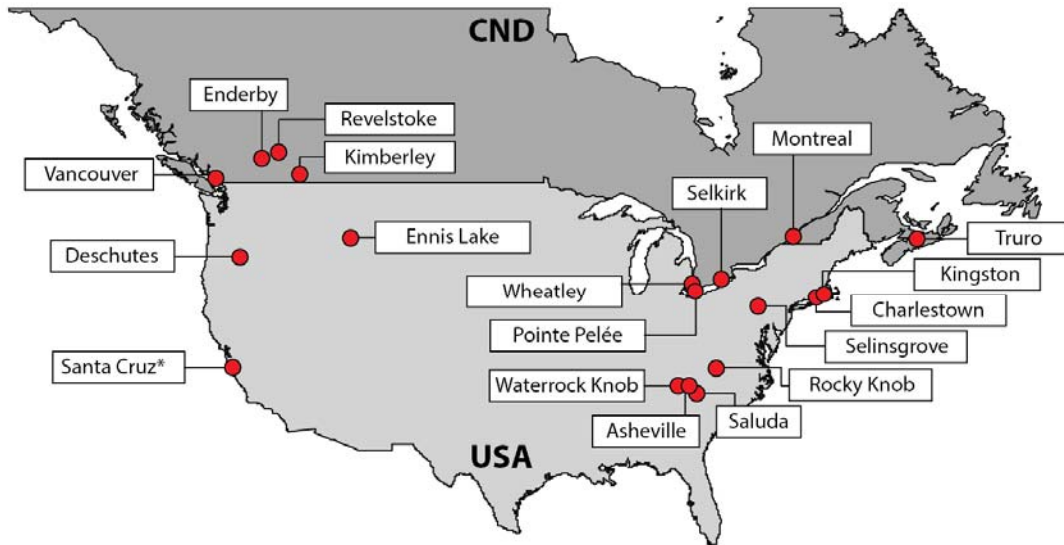

420  
421

422 **Figure 2** – Associations between the thermal regimes (PC1, PC2, PC3) of the 19 populations  
423 of origin and 1<sup>st</sup> clutch parameters. The red lines represent correlations that are significant  
424 after FDR correction. Mean values  $\pm$  SE. Egg laying date was calculated using October 1<sup>st</sup> as  
425 a reference (i.e. as day 0).

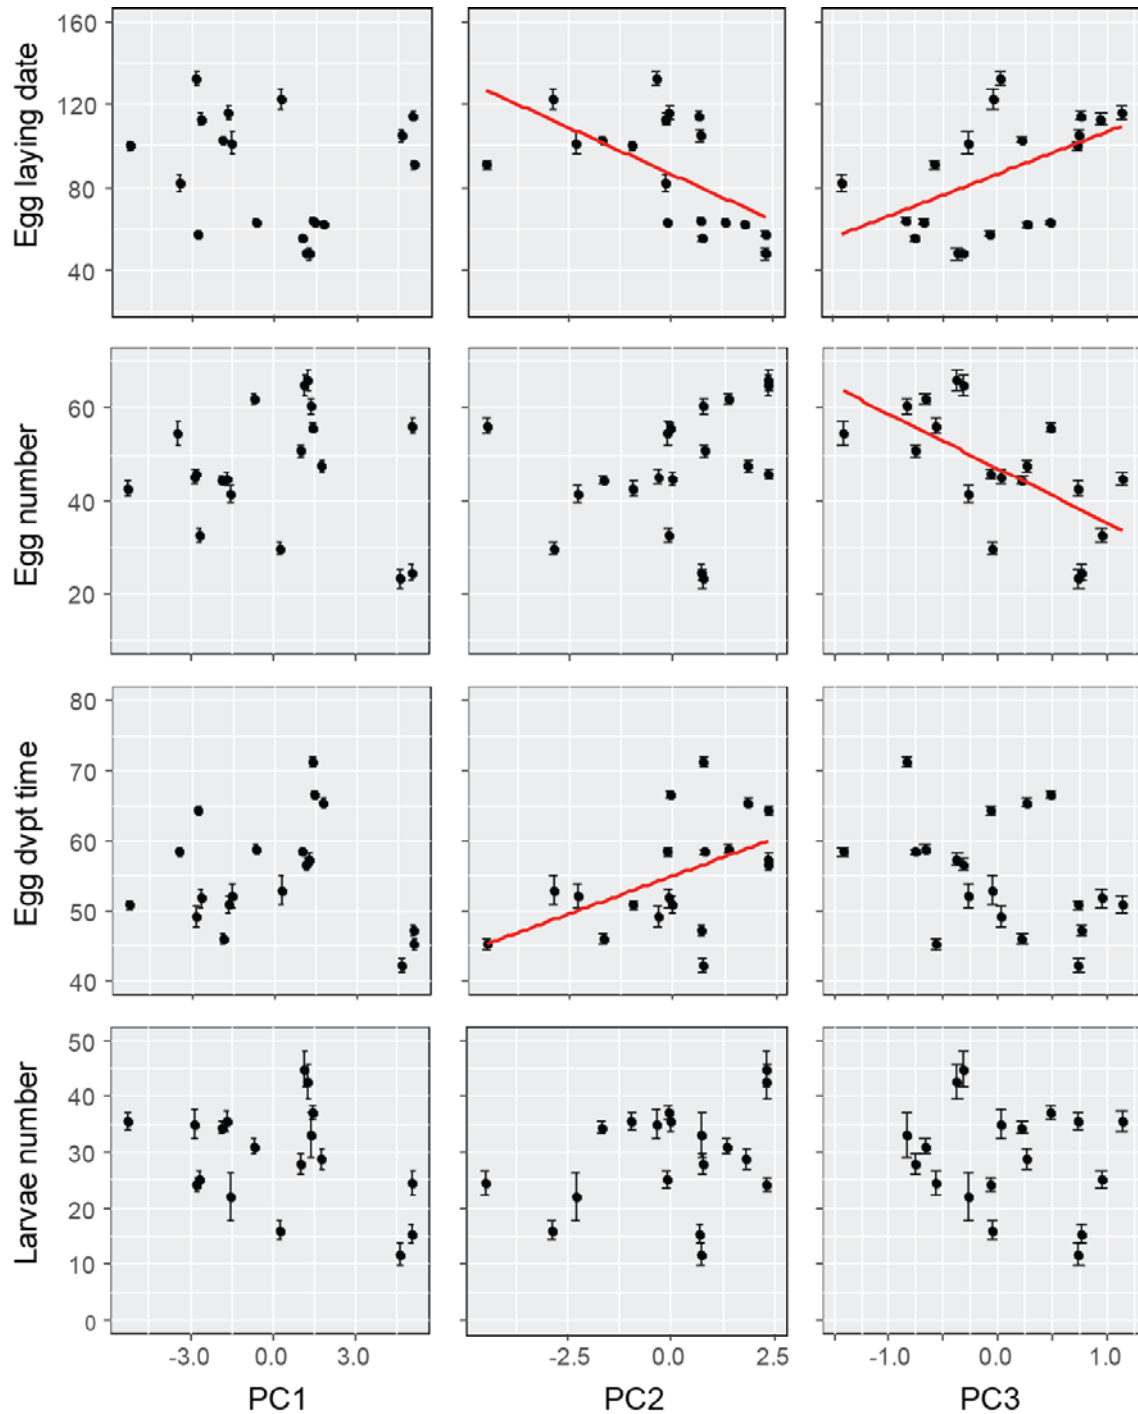

426  
427

428 **Figure 3** – Associations between the thermal regimes (PC1, PC2, PC3) of the 19 populations  
429 of origin and 2<sup>nd</sup> clutch parameters (when produced). The red lines represent correlations  
430 that are significant after FDR correction. Mean values  $\pm$  SE. Egg laying date was calculated  
431 using October 1<sup>st</sup> as a reference (i.e. as day 0).

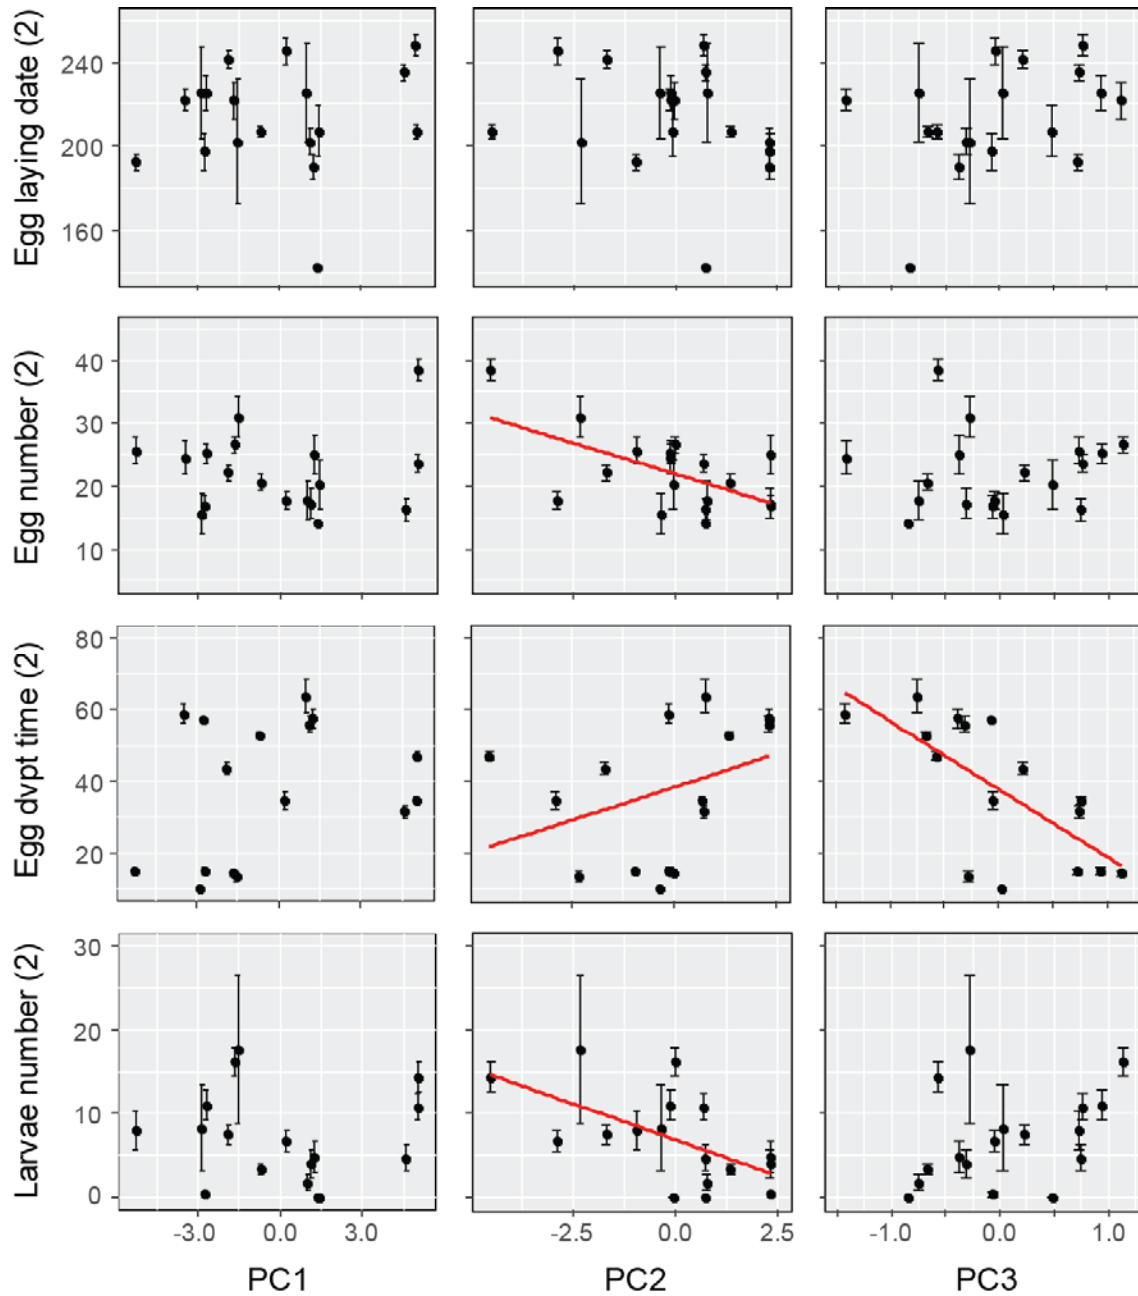

432  
433



434 **Figure 4** – Associations between the thermal regimes (PC1, PC2, PC3) of the 19 populations  
435 of origin and females' reproductive strategies and outcomes, as well as adult's survival  
436 duration. The red lines represent correlations that are significant after FDR correction.  
437 Mean values  $\pm$  SE.

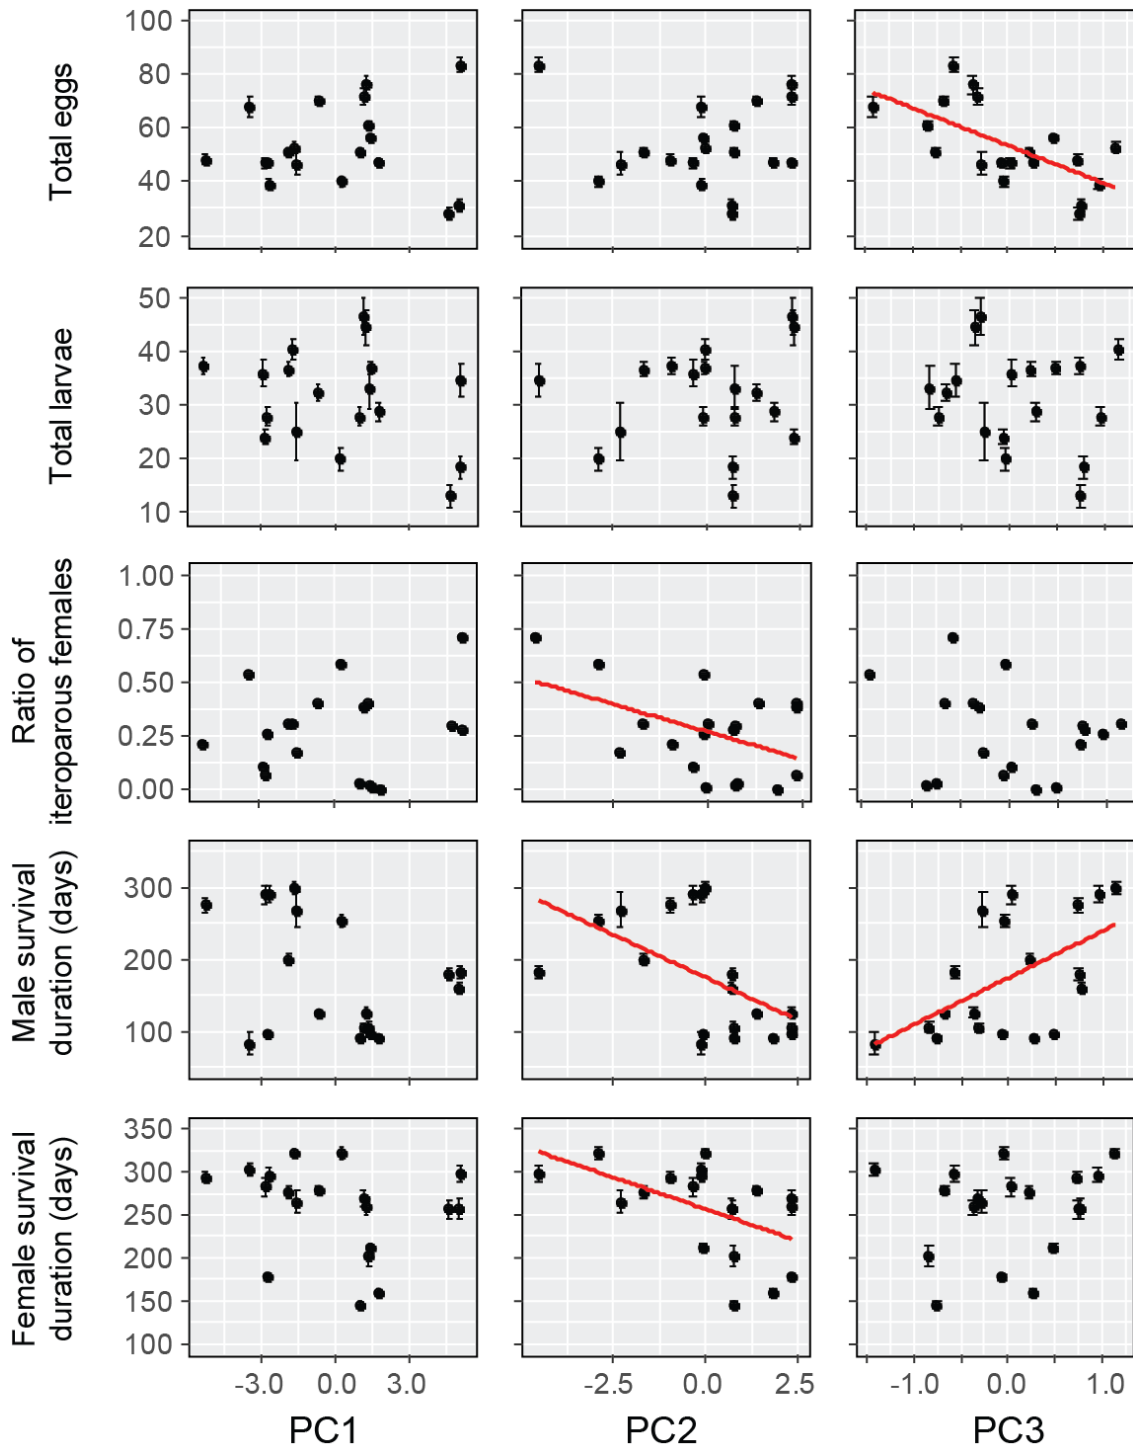

438
